# Supplementary material
Source: Copernicus journal article supplement (doi:10.5194/acp-26-6993-2026)
Supplement: Supplementary file [file acp-26-6993-2026-supplement-title-page.pdf › acp-26-6993-2026-supplement-title-page.pdf]

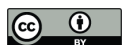

*Supplement of*

**Global Observations and European emissions of the halogenated olefins HFO-1234yf, HFO-1234ze(E), and HCFO-1233zd(E) from the AGAGE (Advanced Global Atmospheric Gases Experiment) network**

**Martin K. Vollmer et al.**

*Correspondence to:* Martin K. Vollmer ([martin.vollmer@empa.ch](mailto:martin.vollmer@empa.ch))

- [acp-26-6993-2026-supplement-title-page.pdf](#)
- [European\\_HFO\\_Supplement.pdf](#)
- [European\\_HFO\\_model\\_posteriors.csv](#)

The copyright of individual parts of the supplement might differ from the article licence.
